# Supplementary material for: Synergistic effect of adsorption-photocatalytic reduction of Cr(vi) in wastewater with biochar/TiO2 composite under simulated sunlight illumination
Source: Royal Society of Chemistry journal article supplement (doi:10.1039/d4cp01226g), 2024-01-01
Supplement: d4cp01226g1.pdf [file d4cp01226g1.pdf]

# Supplementary Material

## **Synergistic effect of adsorption-photocatalytic reduction of Cr(VI) in wastewater with biochar/TiO<sub>2</sub> composite under simulated sunlight illumination**

Yadong Du,<sup>a,b</sup> Xiangju Ye,<sup>b\*</sup> Zhenzhen Hui,<sup>b</sup> Die Jiao,<sup>a</sup> Yue Xie,<sup>a\*</sup> Shifu Chen,<sup>c\*</sup> Jun Ding<sup>d</sup>

<sup>a</sup>College of Resources and Environment, Anhui Science and Technology University, Fengyang, Anhui 233100, P. R. China.

<sup>b</sup>College of Chemistry and Materials Engineering, Anhui Science and Technology University, Bengbu, Anhui 233030, P. R. China.

<sup>c</sup>College of Chemistry and Materials Science, Huaibei Normal University, Huaibei, 235000, P. R. China.

<sup>d</sup>Anhui Haohong Biotechnology Co., Ltd, Hefei, Anhui 230026, P. R. China.

\*Corresponding author, Tel: +86-561-3802000, Fax: +86-561-3802000. E-mail: yexiangju555@126.com; yorke@126.com; chshifu@chnu.edu.cn

## Experimental section

### Materials and chemicals

All materials were purchased from Aladdin Reagent (Shanghai) Co., Ltd., typically tetrabutyl titanate ( $C_{16}H_{36}O_4Ti$ ), potassium dichromate ( $K_2Cr_2O_7$ ), diphenylcarbazide ( $C_{13}H_{14}N_4O$ ), phosphoric acid ( $H_3PO_4$ ), sulfuric acid ( $H_2SO_4$ ), hydrochloric acid (HCl), acetic acid ( $CH_3COOH$ ), anhydrous ethanol ( $C_2H_5OH$ ), acetone ( $CH_3COCH_3$ ), potassium persulfate ( $K_2S_2O_8$ ), ethylenediamine tetraacetic acid (EDTA), benzoquinone (BQ) and methanol (MeOH). All chemicals are analytical grade and used without further purification.

### Characterization of materials

XRD data were collected by using an XRD-6100 Advance X-ray diffractometer (Shimadzu, Cu  $K\alpha$ ,  $\lambda=1.54060 \text{ \AA}$ ) at 45 kV and 100 mA. X-ray photoelectron spectroscopy measurements were carried out on a Thermo Fisher Scientific EscaLab 250Xi spectrometer (XPS-Al  $K\alpha$ -1486.6 eV) with applied voltage (12 kV) and current (23 mA). The optical properties were measured by UV-Vis absorption spectra (Shimadzu UV-3600). High-resolution transmission electron microscopy (HRTEM-JEM-2100F) with an accelerated voltage (200 kV). Scanning electron microscopy (SEM, Hitachi, SU-8100) with an applied voltage (5.0 KV), and energy dispersive spectroscopy (EDS, Oxford, X-MaxN 80T) were used to detect the content and distribution of elements. The specific surface area and pore size were measured by Brunauer-Emmeter-Teller (BET) (Micromeritics ASAP 2460) at 77 K by nitrogen adsorption-desorption isotherm analysis. The thermal stability test was performed on a thermogravimetric analyzer (TG-DTG, STA-449F5, Netzsch, Germany) at a heating rate of 10 °C/min from 40 °C to 800 °C. Electrochemical impedance spectroscopy (EIS) was measured and recorded on an electrochemical workstation (CHI-660E, Chenhua Instruments Co., Shanghai, China) using a traditional three-electrode system in 1 M  $Na_2SO_4$  electrolyte solution at room temperature of 25 °C. Ag/AgCl, carbon rod and sample-covered nickel foam were used as reference electrode, counter electrode and working electrode, respectively. A working electrode sample was prepared by dispersing 10 mg of photocatalyst in 0.5 mL of anhydrous ethanol and 0.5 mL of deionized water. After ultrasonic treatment for 2 h, 0.1 mL of slurry was repeatedly dropped on the nickel foam substrate (1×2 cm), repeated drying and dropping until the sample droplets were added. The measurements were performed at 1 V with a frequency range of 0.01 Hz to 100 kHz and an AC current amplitude of 5 mV. Zeta

potentials were measured by Nanotracs wave II Zetasizer (Microtrac, Germany) to analyze the surface charge and dispersibility of samples.

Table S1. The XPS peak table of as-prepared TBC-3 sample.

| Name | Peak BE | FWHM eV | Area (P) CPS.eV | Atomic % |
|------|---------|---------|-----------------|----------|
| Ti2p | 458.89  | 2.7     | 2452419.79      | 22.2     |
| O1s  | 530.25  | 2.65    | 2484982.05      | 46.0     |
| C1s  | 285.08  | 1.53    | 672481.52       | 31.8     |

Table S2.  $S_{\text{BET}}$ , pore volume, average pore size and most frequent pore diameter of the as-prepared BC,  $\text{TiO}_2$  and TBC-3.

| Samples        | $S_{\text{BET}}$<br>( $\text{m}^2/\text{g}$ ) | Pore volume<br>( $\text{cm}^3/\text{g}$ ) | Average<br>pore size<br>(nm) | Most frequent<br>pore diameter<br>(nm) |
|----------------|-----------------------------------------------|-------------------------------------------|------------------------------|----------------------------------------|
| BC             | 24.6                                          | 0.011                                     | 8.0                          | 26.7                                   |
| $\text{TiO}_2$ | 122.0                                         | 0.065                                     | 2.1                          | 1.7                                    |
| TBC-3          | 306.6                                         | 0.450                                     | 5.9                          | 8.9                                    |

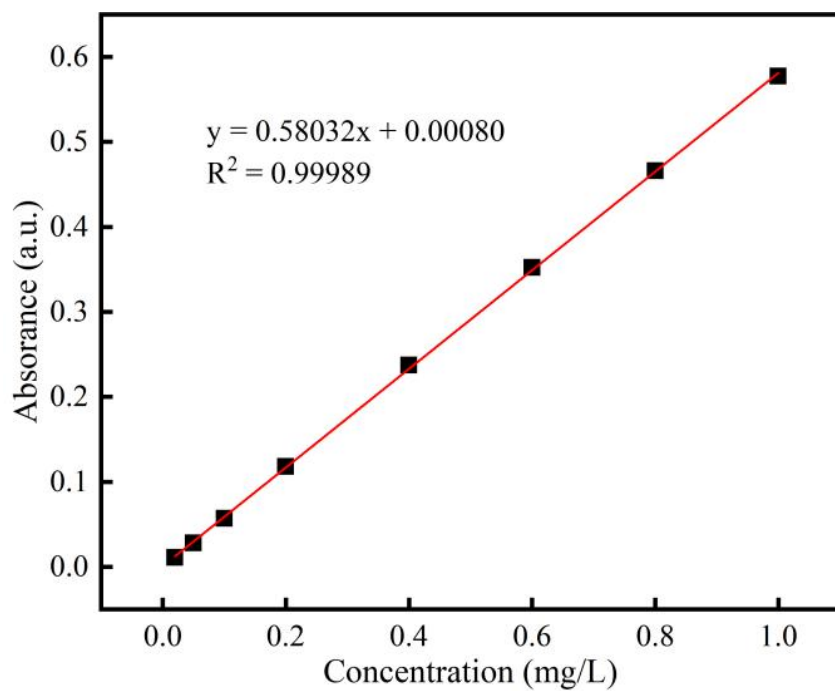

Fig. S1. The linear calibration curve for a series of standard Cr(VI) aqueous solutions.

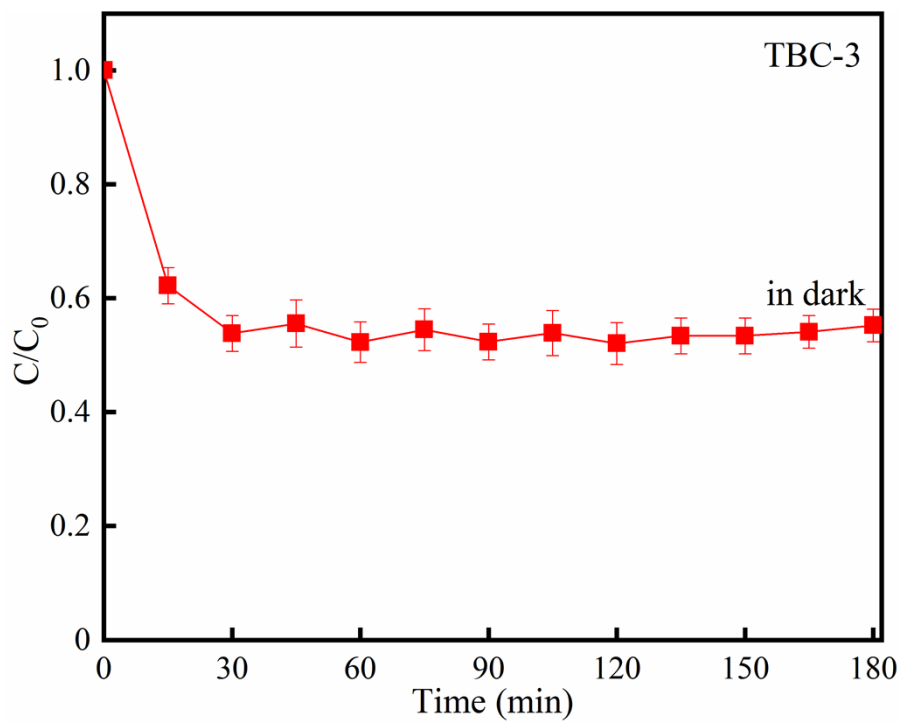

Fig. S2. The adsorption-reduction efficiency of Cr(VI) with TBC-3 sample in dark for 180 min.

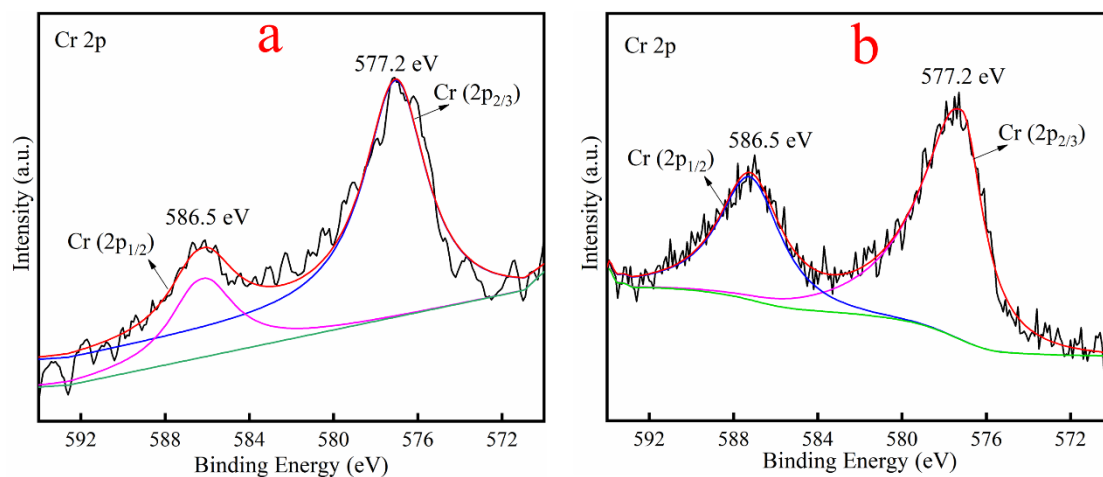

Fig. S3. The XPS spectrum of Cr element on the surface of TBC-3 (a) and in the solution (b) after photocatalytic reaction.

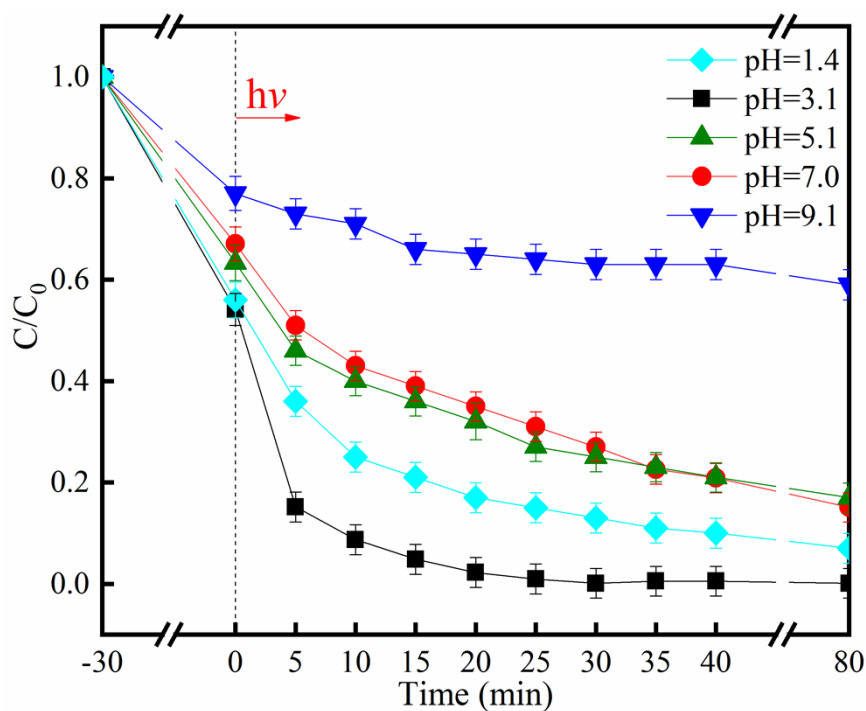

Fig. S4. The adsorption-photocatalytic reduction of Cr ( VI ) with TBC-3 at different pH values.

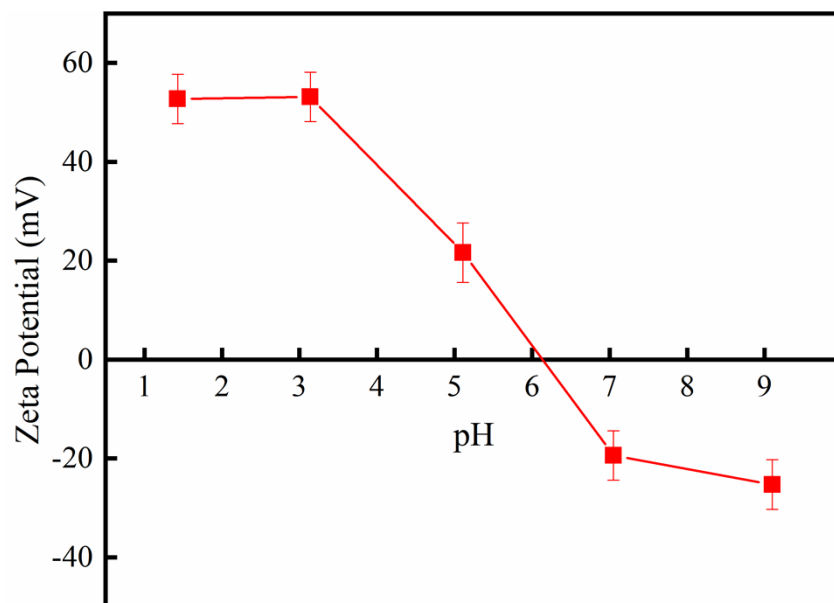

Fig. S5. Zeta potentials of TBC-3 sample at different pH values.
